# Supplementary material for: How Cloud Phase Influences Aerosol Susceptibility
Source: Research Square preprint supplement (doi:10.21203/rs.3.rs-6176374/v1), 2025-04-18
Supplement: Supplementary file 1 [file e89e61d1b27e1f53bdd43a93.docx]

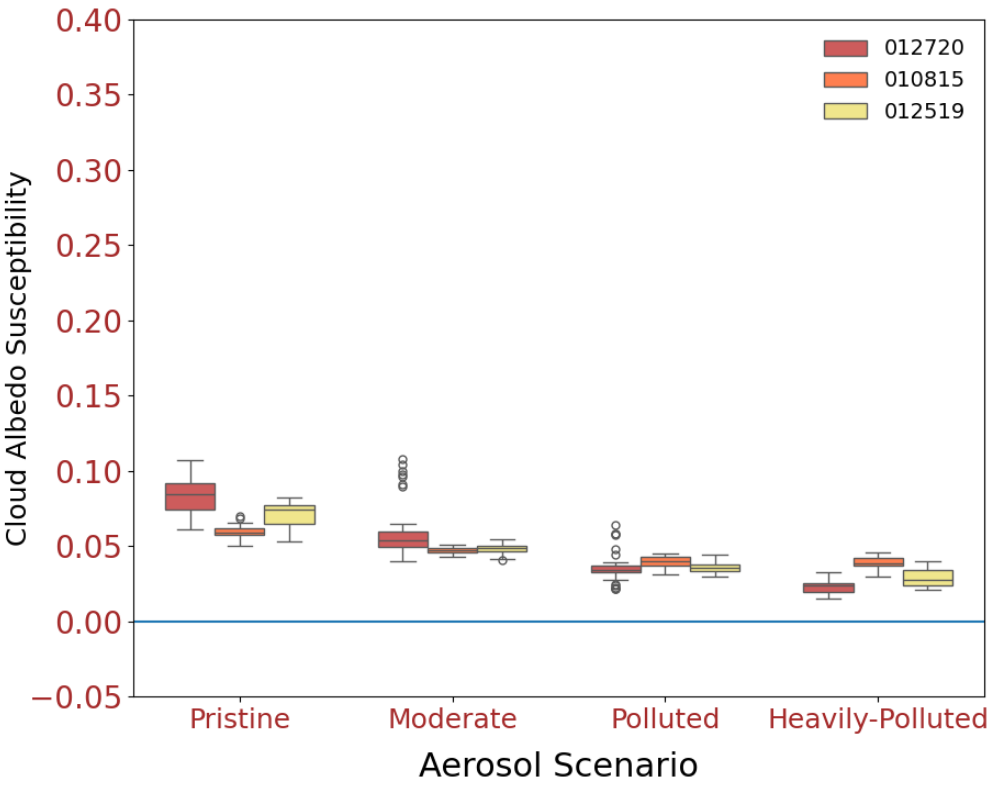


Fig. S1 Box-whisker plot of the cloud albedo susceptibilities in warm cases with the formula following Chen et al. (Chen et al. 2014). The color scheme is the same as in Figure 1b.
